# Supplementary material
Source: PubMed Central journal article supplement (PMC7433023)
Supplement: NIHMS1617637-supplement-Supplementary.pdf [file NIHMS1617637-supplement-Supplementary.pdf]

## **Supplementary material**

### **Characterization of AEBSF-Antibody Modifications for a Protease Inhibitor Supplementation Strategy**

Cindy X. Cai, Nicole A. Schneck, Weidong Zhao, Daniel Blackstock, Jiayan Cai, Doug Harris, Vera B. Ivleva, Deepika Gollapudi, Joe Horwitz, Frank J. Arnold, Jonathan W. Cooper, Q. Paula Lei\*

\*Q. Paula Lei, phone: 1-301-761-7288, email: paula.lei@nih.gov

‡Vaccine Production Program, Vaccine Research Center, National Institute of Allergy and Infectious Diseases, National Institutes of Health, Gaithersburg, MD, USA

## Contents

| <b>Description</b>                                                                | <b>Page</b> |
|-----------------------------------------------------------------------------------|-------------|
| 1. Analysis of the bNAb samples using a middle-up LC-MS technique                 | S3-4        |
| 2. Mass accuracy for the bNAb samples using a middle-up LC-MS technique           | S-5         |
| 3. Characterization of AEBSF-modified amino acids in the positive control samples | S-6         |
| 4. An example of AEBSF-modified peptide identification                            | S-7         |
| 5. PYMOL review of the bNAb                                                       | S-8         |

## 1. Analysis of the bNAb samples using a middle-up LC-MS technique

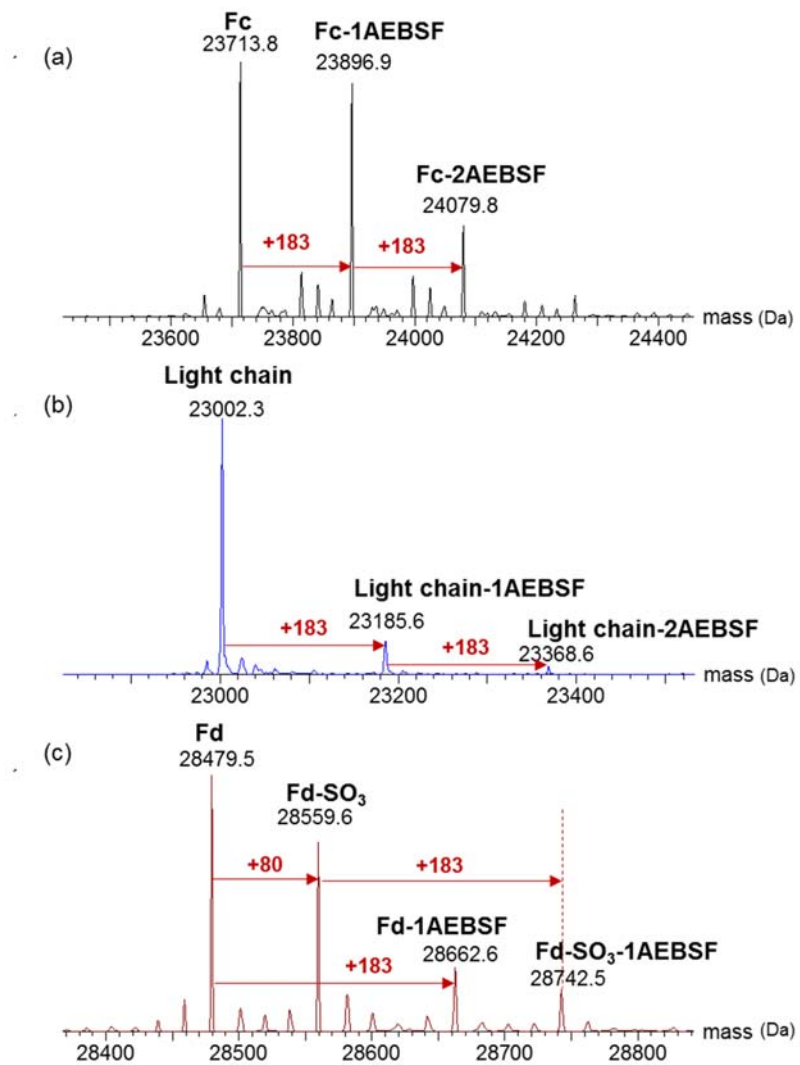

**Figure S1.** Deconvoluted mass spectra of the (a) Fc/2 at 5.2 min, (b) light chain at 7.3 min and (b) Fd at 7.0 min for day-3 positive control of bNAb.

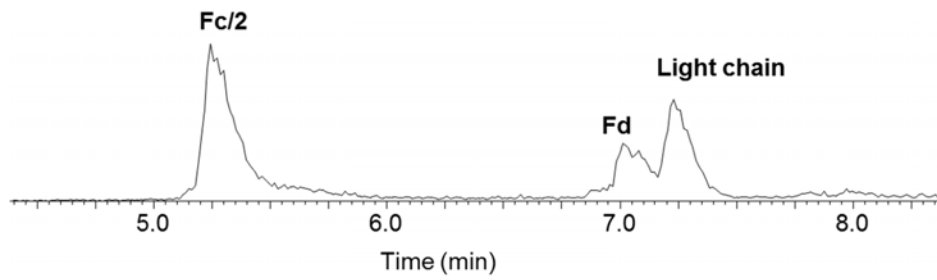

**Figure S2.** A typical TIC of the deglycosylated, IdeS digested and reduced bNAb test article supplemented with AEBSF during the cell culture stage.

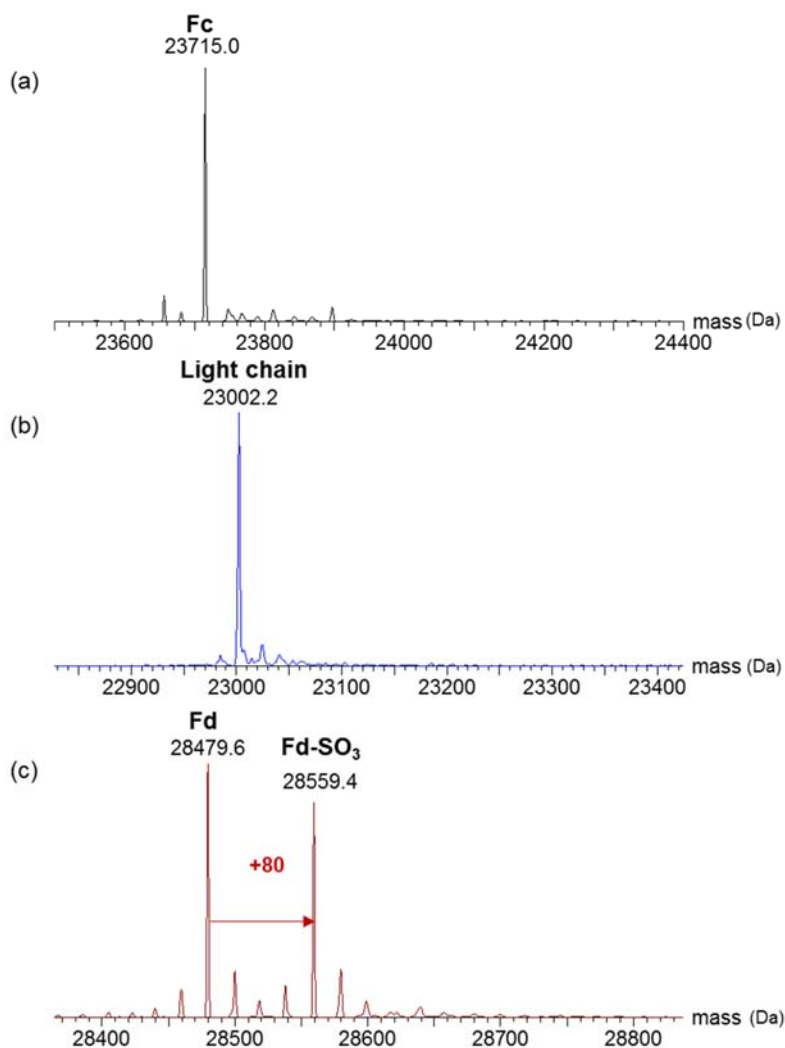

**Figure S3.** Representative deconvoluted mass spectra of the (a) Fc/2 at 5.2 min, (b) light chain at 7.2 min and (c) Fd at 7.0 min for bNAb test article, supplemented with AEBSF during the cell culture stage.

## 2. Mass accuracy for the bNAb samples using a middle-up LC-MS technique

**Table S1.** Theoretical and measured average masses (mass error < 1 Da) of the Fc/2 and light chain subunit in one of the test article lots and day-3 positive control of bNAb from Figure S1 and S3. (ND: not detected)

| Subunit     | # of AEBSF adducts    |                        | 0       | 1       | 2       |
|-------------|-----------------------|------------------------|---------|---------|---------|
| Fc          | Theoretical mass (Da) |                        | 23714.5 | 23897.5 | 24080.6 |
|             | Measured mass (Da)    | Test article Lot#1     | 23715.0 | ND      | ND      |
|             |                       | Day-3 positive control | 23713.8 | 23896.9 | 24079.8 |
| Light chain | Theoretical mass (Da) |                        | 23002.3 | 23185.3 | 23368.4 |
|             | Measured mass (Da)    | Test article Lot#1     | 23002.2 | ND      | ND      |
|             |                       | Day-3 positive control | 23002.3 | 23185.6 | 23368.6 |

**Table S2.** Theoretical and measured average masses (mass accuracy < 1 Da) of the Fd subunit in one of the test article lots and day-3 positive control of bNAb from Figure S1 and S3. (ND: not detected)

| # of sulfation groups |                        | 0       | 1       | 0       | 1       |
|-----------------------|------------------------|---------|---------|---------|---------|
| # of AEBSF adducts    |                        | 0       | 0       | 1       | 1       |
| Theoretical mass (Da) |                        | 28479.9 | 28559.9 | 28662.9 | 28742.9 |
| Measured mass (Da)    | Test article lot#1     | 28479.6 | 28559.4 | ND      | ND      |
|                       | Day-3 positive control | 28479.5 | 28559.6 | 28662.6 | 28472.5 |

### 3. Characterization of AEBSF-modified amino acids in the positive control samples via peptide mapping LC-MS analysis

**Table S3.** Identification and relative quantification of AEBSF-modified peptides in the positive control samples.

| Protein subunit | Amino acid residue # | % AEBSF-modification in positive controls |       |
|-----------------|----------------------|-------------------------------------------|-------|
|                 |                      | Day-3                                     | Day-7 |
| Light Chain     | Lys67                | 1.1                                       | 5.4   |
|                 | Lys161               | 2.9                                       | 8.0   |
|                 | Lys176               | 2.1                                       | 4.0   |
|                 | Lys191               | 3.4                                       | 8.3   |
|                 | Lys209               | 1.9                                       | 6.1   |
|                 | Tyr50                | 1.1                                       | 4.7   |
|                 | Tyr177               | 29.7                                      | 66.5  |
| Fd              | Tyr32                | 1.7                                       | 9.7   |
|                 | Lys57                | 1.2                                       | 5.2   |
|                 | Lys123               | 1.6                                       | 6.3   |
|                 | Lys161               | 2.4                                       | 13.3  |
|                 | Lys250               | 27.5                                      | 31.7  |
| Fc              | Lys362               | 2.0                                       | 6.3   |
|                 | Lys420               | 1.5                                       | 5.1   |
|                 | Lys442               | 2.8                                       | 12.4  |
|                 | Tyr401               | 5.0                                       | 18.7  |
|                 | His313               | 1.4                                       | 3.0   |
|                 | His461               | 7.6                                       | 16.2  |

#### 4. An example of AEBSF-modified peptide identification

Unmodified peptide F<sup>29</sup>DGYGMHWVR (monoisotopic mass 1266.57 Da) was observed at 32.4 min in the negative control, day-7 positive control and test article. The AEBSF-modified peptide (monoisotopic mass 1449.63 Da) was well-separated from the unmodified one and was detected at 37.0 min only in the day-7 positive control with +183 Da mass shift. In addition, the fragment ion mass shifts of +183 Da were detected for y7-y9 not for y1-y6 in MS/MS spectra in two peptides, which pinpoints the modified amino acid, Y32.

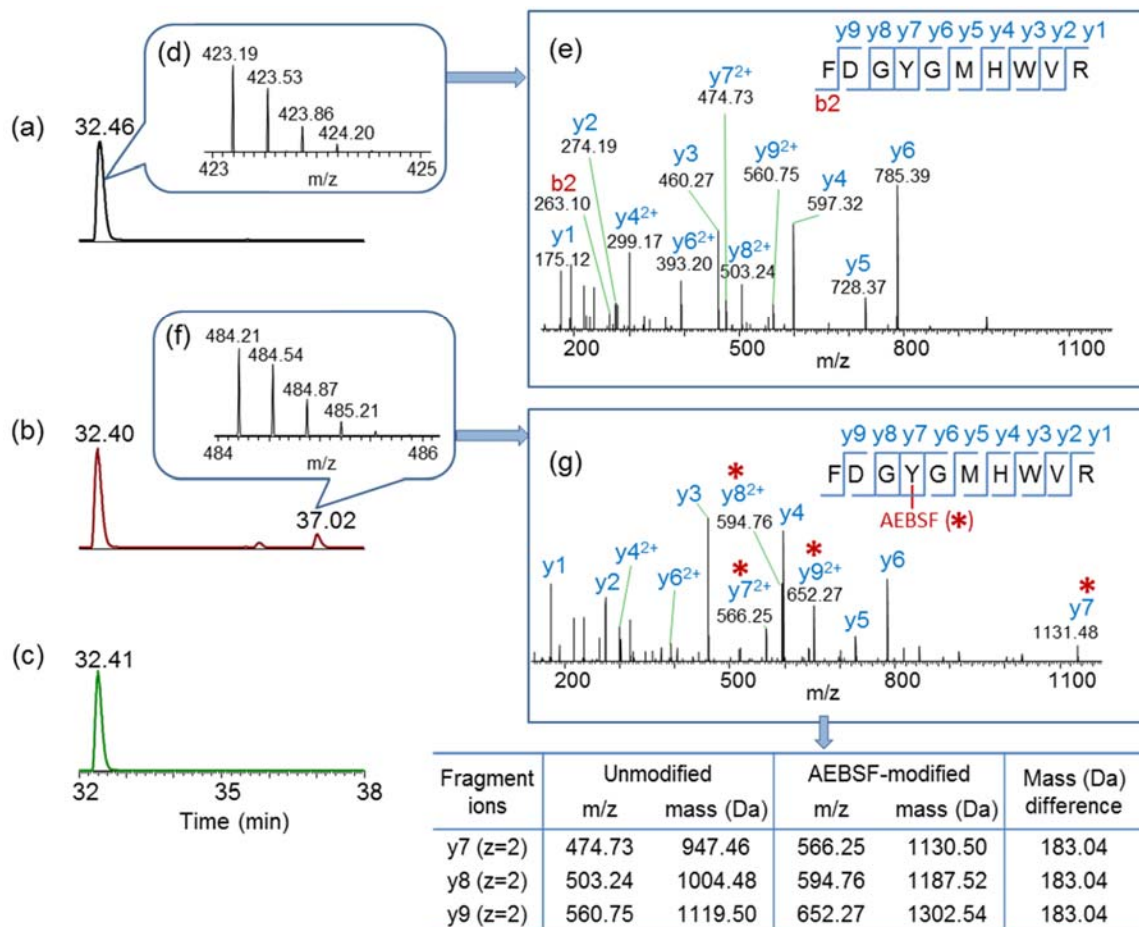

**Figure S4.** The XICs, MS and MS/MS spectra of the unmodified and AEBSF-modified peptide F<sup>29</sup>DGYGMHWVR. The XIC (extracted m/z ranges: 363.0-365.0, 423.0-425.0, 484.0-486.0, 634.0-636.0) of the unmodified peptide (m/z 423.19, z=3 and m/z 634.39, z=2) was detected at 32.4 min for (a) the negative control, (b) the day-7 positive control and (c) test article (y-axis: relative abundance, normalized to the highest peak in the selected time range), and the AEBSF-modified peptide (m/z 363.41, z=4 and m/z 484.21, z=3) was only detected in the 7-day positive control. The unmodified peptide with (d) precursor ion m/z 423.19 (z=3) and the AEBSF-modified peptide with (f) precursor ion m/z 484.21 (z=3) shows (g) similar y1-6 ions but different y7-y9 ions respectively. (\*: AEBSF modified fragment ions; y-axis of MS is relative abundance, normalized to the highest peak in each spectrum.)

## 5. PyMOL review of the bNAb

PyMOL™ software was used for visualizing the 3D structure of the Fab region of the bNAb. 3-D-crystallographic analysis of the bNAb (Protein Databank sequence entry: 5dt1) was reviewed using PyMOL™ Molecular Graphic System, v. 1.8.2.3.

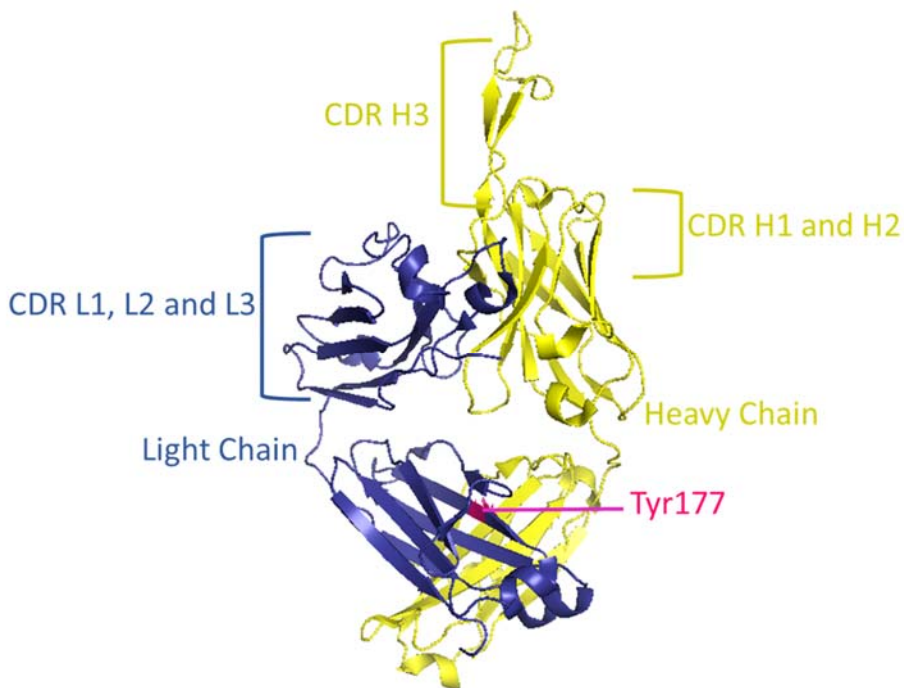

**Figure S5.** PYMOL review of the antigen-binding fragment (Fab) of the bNAb. CDR regions are labeled, Tyr177 is in pink color, and the unlabeled Lys250 is below the green ribbon diagram (not shown) [12].
